# Supplementary material for: PPCM: Combing Multiple Classifiers to Improve Protein-Protein Interaction Prediction
Source: Hindawi journal article supplement (doi:10.1155/2015/608042), 2015-01-01
Supplement: f1 [file 608042.f1.pdf]

**Table S1.** The individual classifiers of GO2PPI merged by PPCM

| NO. | Machine learning algorithm GO NetWork |
|-----|---------------------------------------|
| 1   | nb bp AT                              |
| 2   | nb bp DM                              |
| 3   | nb bp EC                              |
| 4   | nb bp HS                              |
| 5   | nb bp MM                              |
| 6   | nb bp SC                              |
| 7   | nb bp SP                              |
| 8   | nb bpcc AT                            |
| 9   | nb bpcc DM                            |
| 10  | nb bpcc EC                            |
| 11  | nb bpcc HS                            |
| 12  | nb bpcc MM                            |
| 13  | nb bpcc SC                            |
| 14  | nb bpcc SP                            |
| 15  | nb bpccmf AT                          |
| 16  | nb bpccmf DM                          |
| 17  | nb bpccmf EC                          |
| 18  | nb bpccmf HS                          |
| 19  | nb bpccmf MM                          |
| 20  | nb bpccmf SC                          |
| 21  | nb bpccmf SP                          |
| 22  | nb bpmf AT                            |
| 23  | nb bpmf DM                            |
| 24  | nb bpmf EC                            |
| 25  | nb bpmf HS                            |
| 26  | nb bpmf MM                            |
| 27  | nb bpmf SC                            |
| 28  | nb bpmf SP                            |
| 29  | nb cc AT                              |
| 30  | nb cc DM                              |
| 31  | nb cc EC                              |
| 32  | nb cc HS                              |
| 33  | nb cc MM                              |
| 34  | nb cc SC                              |
| 35  | nb cc SP                              |
| 36  | nb ccmf AT                            |
| 37  | nb ccmf DM                            |

|    |              |
|----|--------------|
| 38 | nb ccmf EC   |
| 39 | nb ccmf HS   |
| 40 | nb ccmf MM   |
| 41 | nb ccmf SC   |
| 42 | nb ccmf SP   |
| 43 | nb mf AT     |
| 44 | nb mf DM     |
| 45 | nb mf EC     |
| 46 | nb mf HS     |
| 47 | nb mf MM     |
| 48 | nb mf SC     |
| 49 | nb mf SP     |
| 50 | rf bp AT     |
| 51 | rf bp DM     |
| 52 | rf bp EC     |
| 53 | rf bp HS     |
| 54 | rf bp MM     |
| 55 | rf bp SC     |
| 56 | rf bp SP     |
| 57 | rf bpcc AT   |
| 58 | rf bpcc DM   |
| 59 | rf bpcc EC   |
| 60 | rf bpcc HS   |
| 61 | rf bpcc MM   |
| 62 | rf bpcc SC   |
| 63 | rf bpcc SP   |
| 64 | rf bpccmf AT |
| 65 | rf bpccmf DM |
| 66 | rf bpccmf EC |
| 67 | rf bpccmf HS |
| 68 | rf bpccmf MM |
| 69 | rf bpccmf SC |
| 70 | rf bpccmf SP |
| 71 | rf bpmf AT   |
| 72 | rf bpmf DM   |
| 73 | rf bpmf EC   |
| 74 | rf bpmf HS   |
| 75 | rf bpmf MM   |
| 76 | rf bpmf SC   |
| 77 | rf bpmf SP   |
| 78 | rf cc AT     |

|    |            |
|----|------------|
| 79 | rf cc DM   |
| 80 | rf cc EC   |
| 81 | rf cc HS   |
| 82 | rf cc MM   |
| 83 | rf cc SC   |
| 84 | rf cc SP   |
| 85 | rf ccmf AT |
| 86 | rf ccmf DM |
| 87 | rf ccmf EC |
| 88 | rf ccmf HS |
| 89 | rf ccmf MM |
| 90 | rf ccmf SC |
| 91 | rf ccmf SP |
| 92 | rf mf AT   |
| 93 | rf mf DM   |
| 94 | rf mf EC   |
| 95 | rf mf HS   |
| 96 | rf mf MM   |
| 97 | rf mf SC   |
| 98 | rf mf SP   |

Table S2. The individual classifiers of Phyloprof merged by PPCM.

| NO. | Network taxa optimization PPI prediction |
|-----|------------------------------------------|
| 1   | AT hg et                                 |
| 2   | AT hg ga                                 |
| 3   | AT hg gapd                               |
| 4   | AT hg gatc                               |
| 5   | AT hg ite                                |
| 6   | AT hg ot                                 |
| 7   | AT hg rt                                 |
| 8   | AT hg to                                 |
| 9   | AT mi et                                 |
| 10  | AT mi ga                                 |
| 11  | AT mi gapd                               |
| 12  | AT mi gatc                               |
| 13  | AT mi ite                                |
| 14  | AT mi ot                                 |
| 15  | AT mi rt                                 |
| 16  | AT mi to                                 |
| 17  | AT sb et                                 |
| 18  | AT sb ga                                 |
| 19  | AT sb gapd                               |
| 20  | AT sb gatc                               |
| 21  | AT sb ite                                |
| 22  | AT sb ot                                 |
| 23  | AT sb rt                                 |
| 24  | AT sb to                                 |
| 25  | SC hg et                                 |
| 26  | SC hg ga                                 |
| 27  | SC hg gapd                               |
| 28  | SC hg gatc                               |
| 29  | SC hg ite                                |
| 30  | SC hg ot                                 |
| 31  | SC hg rt                                 |
| 32  | SC hg to                                 |
| 33  | SC mi et                                 |
| 34  | SC mi ga                                 |
| 35  | SC mi gapd                               |
| 36  | SC mi gatc                               |
| 37  | SC mi ite                                |
| 38  | SC mi ot                                 |
| 39  | SC mi rt                                 |

|    |            |
|----|------------|
| 40 | SC mi to   |
| 41 | SC sb et   |
| 42 | SC sb ga   |
| 43 | SC sb gapd |
| 44 | SC sb gatc |
| 45 | SC sb ite  |
| 46 | SC sb ot   |
| 47 | SC sb rt   |
| 48 | SC sb to   |
| 49 | HS hg et   |
| 50 | HS hg ga   |
| 51 | HS hg gapd |
| 52 | HS hg gatc |
| 53 | HS hg ite  |
| 54 | HS hg ot   |
| 55 | HS hg rt   |
| 56 | HS hg to   |
| 57 | HS mi et   |
| 58 | HS mi ga   |
| 59 | HS mi gapd |
| 60 | HS mi gatc |
| 61 | HS mi ite  |
| 62 | HS mi ot   |
| 63 | HS mi rt   |
| 64 | HS mi to   |
| 65 | HS sb et   |
| 66 | HS sb ga   |
| 67 | HS sb gapd |
| 68 | HS sb gatc |
| 69 | HS sb ite  |
| 70 | HS sb ot   |
| 71 | HS sb rt   |
| 72 | HS sb to   |
| 73 | EC hg et   |
| 74 | EC hg ga   |
| 75 | EC hg gapd |
| 76 | EC hg gatc |
| 77 | EC hg ite  |
| 78 | EC hg ot   |
| 79 | EC hg rt   |
| 80 | EC hg to   |

|    |            |
|----|------------|
| 81 | EC mi et   |
| 82 | EC mi ga   |
| 83 | EC mi gapd |
| 84 | EC mi gatc |
| 85 | EC mi ite  |
| 86 | EC mi ot   |
| 87 | EC mi rt   |
| 88 | EC mi to   |
| 89 | EC sb et   |
| 90 | EC sb ga   |
| 91 | EC sb gapd |
| 92 | EC sb gatc |
| 93 | EC sb ite  |
| 94 | EC sb ot   |
| 95 | EC sb rt   |
| 96 | EC sb to   |
